# Supplementary material for: Polygalae Radix Oligosaccharide Esters May Relieve Depressive-like Behavior in Rats with Chronic Unpredictable Mild Stress via Modulation of Gut Microbiota
Source: MDPI journal article supplement (doi:10.3390/ijms241813877), 2023-09-09
Supplement: s1 [file s1]

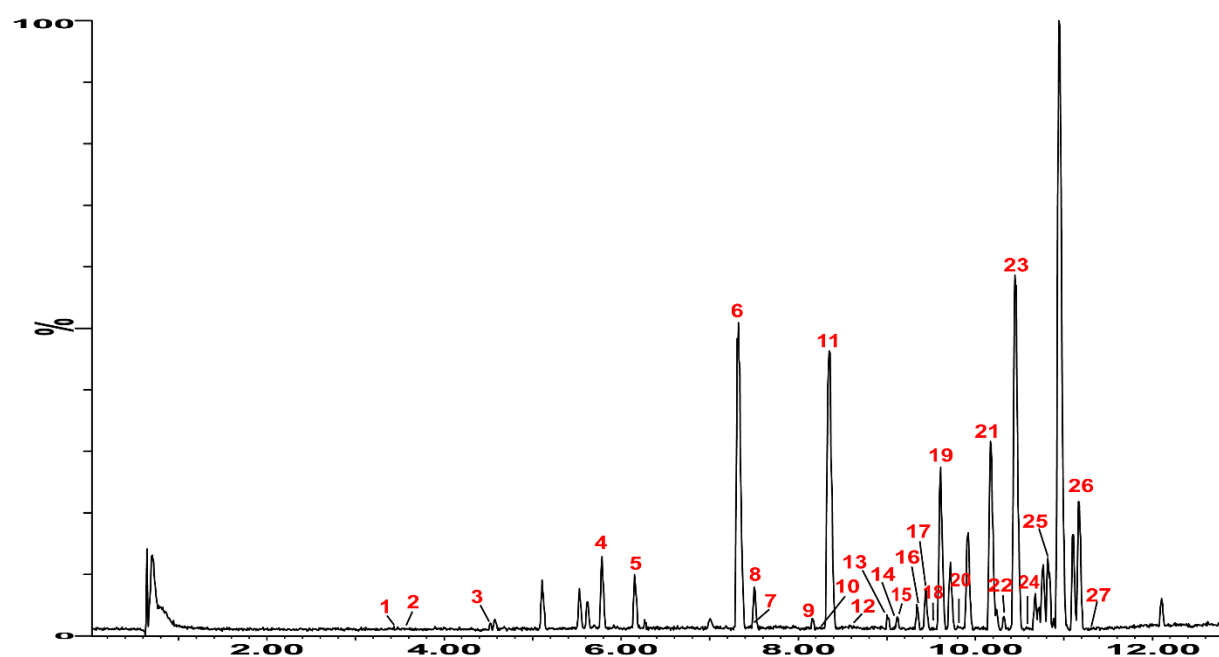

**Figure S1** The UPLC-QTOF-MS chromatograms of PROEs

**Table S1** UPLC-QTOF-MS data in the negative ion mode of the major chemical components in PROEs

| Peak | RT<br>(min) | Molecular<br>formula                            | Measured<br>( <i>m/z</i> ) | Calculated<br>( <i>m/z</i> ) | Mass error<br>/ppm | MS/MS <sup>-</sup> (-)                                                                                   | Identified<br>compounds |
|------|-------------|-------------------------------------------------|----------------------------|------------------------------|--------------------|----------------------------------------------------------------------------------------------------------|-------------------------|
| 1    | 3.16        | C <sub>22</sub> H <sub>30</sub> O <sub>14</sub> | 517.1547                   | 517.1563                     | -3.09              | 437, 471, 259, 275, 337, 245, 341                                                                        | Sibiricose A5           |
| 2    | 3.41        | C <sub>23</sub> H <sub>32</sub> O <sub>15</sub> | 547.1660                   | 547.1663                     | -0.55              | 205, 473, 223, 341, 271, 367, 275,<br>283, 471, 437, 431, 495, 531, 337,<br>429, 317                     | Sibiricose A6           |
| 3    | 4.29        | C <sub>23</sub> H <sub>32</sub> O <sub>15</sub> | 547.1660                   | 547.1663                     | -0.55              | 385, 237, 367, 295, 325, 208, 221,<br>341, 265, 223, 205                                                 | Sibiricose A1           |
| 4    | 5.53        | C <sub>24</sub> H <sub>34</sub> O <sub>15</sub> | 561.1862                   | 561.1819                     | 7.70               | 337, 287, 217, 369, 340, 281, 499,<br>209, 265, 279, 307, 365, 517, 529,<br>345, 221, 473, 323, 443, 251 | Sibiricose A2           |
| 5    | 5.94        | C <sub>30</sub> H <sub>36</sub> O <sub>17</sub> | 667.1904                   | 667.1844                     | 8.98               | 203, 205, 209, 217, 219, 221, 221,<br>223, 237, 239, 239 245, 247, 263,<br>265, 277, 281, 295, 299, 305  | Tenuifolside B          |

|    |      |                                                 |           |           |       |                                                                                                                               |                                      |
|----|------|-------------------------------------------------|-----------|-----------|-------|-------------------------------------------------------------------------------------------------------------------------------|--------------------------------------|
| 6  | 7.14 | C <sub>34</sub> H <sub>42</sub> O <sub>19</sub> | 753.2262  | 753.2242  | 2.65  | 753, 547, 529, 367, 223, 205                                                                                                  | 3,6'-Disinapoyl<br>sucrose           |
| 7  | 7.27 | C <sub>31</sub> H <sub>38</sub> O <sub>17</sub> | 681.2036  | 681.2031  | 0.73  | 237, 315, 281, 443, 519, 341, 413,<br>461, 323, 243, 647, 279, 255, 537,<br>239, 551, 263, 221, 629, 665                      | Tenuifoliside A                      |
| 8  | 7.31 | C <sub>33</sub> H <sub>40</sub> O <sub>18</sub> | 723.2124  | 723.2136  | -1.66 | 205, 223, 265, 547, 427, 529, 235,<br>517, 221, 499, 697, 337, 367, 325,<br>295, 623, 245, 569, 287, 347                      | 1-Sinapoyl-2-<br>feruloylgentiobiose |
| 9  | 8.02 | C <sub>66</sub> H <sub>84</sub> O <sub>38</sub> | 1483.4568 | 1483.4557 | 0.74  | 1337, 1161, 1453, 1307, 1119,<br>1295, 1359, 1275, 1101, 1265,<br>1143, 1039, 1329, 1317, 1215,<br>997, 1057, 1099, 1191, 957 | Tenuifoliose G                       |
| 10 | 8.04 | C <sub>29</sub> H <sub>34</sub> O <sub>15</sub> | 621.1835  | 621.1819  | 2.57  | 499, 517, 235, 485, 571, 223, 295,<br>413, 481, 447, 307, 273, 323, 277,<br>217, 263, 247, 347                                | Reiniose B                           |
| 11 | 8.11 | C <sub>36</sub> H <sub>44</sub> O <sub>20</sub> | 681.2036  | 681.2031  | 0.73  | 631, 753, 703, 673, 751, 649, 691,<br>547, 769, 693, 461, 735, 703, 613,<br>731, 487, 427, 413, 517, 757                      | Tenuifoliside A*                     |
| 12 | 8.58 | C <sub>55</sub> H <sub>68</sub> O <sub>31</sub> | 1223.3562 | 1223.3666 | -8.50 | 1077, 955, 809, 1059, 931, 915,<br>647, 793, 1101, 753, 145, 665,<br>769, 307, 305, 791, 485, 503, 323,<br>339                | Tenuifoliose S                       |
| 13 | 8.85 | C <sub>56</sub> H <sub>70</sub> O <sub>32</sub> | 1253.3682 | 1253.3772 | -7.18 | 1077, 1161, 955, 1059, 1131, 753,<br>1119, 1143, 681, 931, 1107, 915,<br>793, 631, 1039, 1099, 809, 647,<br>937, 427          | Tenuifoliose T                       |

|    |      |                                                 |           |           |       |                                                                                                                                                                 |                  |
|----|------|-------------------------------------------------|-----------|-----------|-------|-----------------------------------------------------------------------------------------------------------------------------------------------------------------|------------------|
| 14 | 8.96 | C <sub>68</sub> H <sub>86</sub> O <sub>39</sub> | 1525.4622 | 1525.4662 | -2.62 | 1161, 1337, 1323, 1471, 1401,<br>1143, 1185, 1257, 1319, 1081,<br>1441, 1119, 1359, 1295, 1039,<br>1483, 737, 1289, 891, 1061                                   | Tenuifoliose F   |
| 15 | 8.97 | C <sub>67</sub> H <sub>84</sub> O <sub>38</sub> | 1496.4719 | 1495.4646 | 5.30  | 1349, 1203, 1223, 1161, 1337,<br>1307, 1323, 1143, 1185, 1101,<br>1257, 1283, 1077, 1107, 1081,<br>1441, 1119, 1227, 1371, 1295,<br>1453, 1367, 955, 1039, 1289 | Tenuifoliose L   |
| 16 | 9.16 | C <sub>57</sub> H <sub>70</sub> O <sub>32</sub> | 1265.3704 | 1265.3766 | -4.90 | 1119, 997, 1077, 1101, 955, 1143,<br>973, 1223, 1059, 851, 835, 753,<br>1141, 979, 631, 689, 937, 1161,<br>1099, 735                                            | Tenuifoliose K   |
| 17 | 9.23 | C <sub>35</sub> H <sub>44</sub> O <sub>19</sub> | 767.2399  | 767.2399  | 0.00  | 205, 223, 529, 237, 265, 367, 221,<br>325, 349, 547, 295, 337, 569, 209,<br>647, 235, 723, 307, 551, 279                                                        | Tenuifolioside C |
| 18 | 9.34 | C <sub>56</sub> H <sub>70</sub> O <sub>32</sub> | 1253.3682 | 1253.3772 | -7.18 | 1077, 1161, 955, 1059, 1131, 753,<br>1119, 1143, 681, 931, 1107, 915,<br>793, 631, 1039, 1099, 809, 647,<br>937, 427                                            | Tenuifoliose T*  |
| 19 | 9.43 | C <sub>58</sub> H <sub>72</sub> O <sub>33</sub> | 1295.3794 | 1295.3878 | -6.48 | 1119, 1077, 997, 973, 851                                                                                                                                       | Tenuifoliose C   |
| 20 | 9.69 | C <sub>59</sub> H <sub>74</sub> O <sub>34</sub> | 1325.3979 | 1325.3983 | -0.30 | 1149, 1027, 237, 701, 1131, 1203,<br>728, 1107, 665, 1265, 1225, 1089,<br>973, 1121, 1009, 273, 987, 1171,<br>865, 1163                                         | Tenuifoliose P   |

|    |       |                                                 |           |           |       |                                                                                                                                                          |                   |
|----|-------|-------------------------------------------------|-----------|-----------|-------|----------------------------------------------------------------------------------------------------------------------------------------------------------|-------------------|
| 21 | 9.73  | C <sub>59</sub> H <sub>72</sub> O <sub>33</sub> | 1307.3835 | 1307.3872 | -2.83 | 1161, 1039, 1119, 1143, 997,<br>1185, 1015, 1265, 1101, 1203,<br>893, 1183, 1021, 795, 979, 877,<br>673, 1061, 731, 1141                                 | Tenuifoliose I/J  |
| 22 | 9.99  | C <sub>60</sub> H <sub>74</sub> O <sub>34</sub> | 1337.3965 | 1337.3978 | -0.97 | 1161, 1119, 1295, 1101, 997,<br>1039, 1143, 1215, 1191, 1173,<br>1277, 979, 753, 1015, 1149, 1077,<br>973, 957, 1133, 631, 835, 1021,<br>851, 1253, 1059 | Tenuifoliose B/D  |
| 23 | 10.23 | C <sub>61</sub> H <sub>76</sub> O <sub>35</sub> | 1367.4180 | 1367.4089 | 6.65  | 1191, 1337, 1325, 1069, 1245,<br>849, 1173, 1119, 1101, 807, 1149,<br>205, 871, 223, 1295, 1051, 1321,<br>912, 1029, 829                                 | Tenuifoliose O    |
| 24 | 10.33 | C <sub>59</sub> H <sub>72</sub> O <sub>33</sub> | 1307.3835 | 1307.3872 | -2.83 | 1161, 1039, 1119, 1143, 997,<br>1185, 1015, 1265, 1101, 1203,<br>893, 1183, 1021, 795, 979, 877,<br>673, 1061, 731, 1141                                 | Tenuifoliose I/J* |
| 25 | 10.62 | C <sub>60</sub> H <sub>74</sub> O <sub>34</sub> | 1337.3965 | 1337.3978 | -0.97 | 1161, 1119, 1295, 1101, 997,<br>1039, 1143, 1215, 1191, 1173,<br>1277, 979, 753, 1015, 1149, 1077,<br>973, 957, 1133, 631, 835, 1021,<br>851, 1253, 1059 | Tenuifoliose B/D* |
| 26 | 11.01 | C <sub>62</sub> H <sub>76</sub> O <sub>35</sub> | 1379.3989 | 1379.4083 | -6.81 | 1203, 1161, 1337, 1143, 1081,<br>1257, 1039, 1185, 1319, 1215,<br>1119, 997, 1021, 795, 1057, 1101,<br>1175, 1015, 673, 1063, 979, 893,<br>971, 877, 731 | Tenuifoliose A    |

|    |       |                                                 |           |           |       |                                                                                                                                                                 |                |
|----|-------|-------------------------------------------------|-----------|-----------|-------|-----------------------------------------------------------------------------------------------------------------------------------------------------------------|----------------|
| 27 | 11.14 | C <sub>63</sub> H <sub>78</sub> O <sub>36</sub> | 1409.4067 | 1409.4189 | -8.65 | 1233, 1337, 1191, 1367, 1173,<br>1111, 1295, 1287, 1215, 1069,<br>1349, 1277, 1309, 1245, 1267,<br>1051, 1057, 1093, 1081, 999,<br>1149, 1015, 1347, 1213, 1039 | Tenuifoliose N |
|----|-------|-------------------------------------------------|-----------|-----------|-------|-----------------------------------------------------------------------------------------------------------------------------------------------------------------|----------------|

Note \*: isomers substances
